# Supplementary material for: Physiotherapists’ views on the Australian Physiotherapy Association’s Choosing Wisely recommendations: a content analysis
Source: PubMed Central journal article supplement — BMJ Open. 2019 Sep 20;9(9):e031360. doi: 10.1136/bmjopen-2019-031360 (PMC6756333; doi:10.1136/bmjopen-2019-031360), 2019-09-20
Supplement: bmjopen-2019-031360supp002.pdf [file bmjopen-2019-031360supp002.pdf]

Supplementary Table 2. Number of responses, codes, percent exact agreement and Kappa (95% Confidence Interval) for the level of agreement between reviews for coding a random sample of responses

| <b>Characteristic of recommendations</b> | <b>N (%)</b> | <b>Codes</b> | <b>Agreement</b> | <b>k</b> | <b>95% CI</b> |
|------------------------------------------|--------------|--------------|------------------|----------|---------------|
| All sections                             | 114 (24.8)   | 165          | 86%              | 0.85     | 0.78-0.91     |
| Section 1                                | 16 (20.5)    | 24           | 91%              | 0.89     | 0.73-1.00     |
| Section 2                                | 15 (25.9)    | 18           | 94%              | 0.91     | 0.68-1.00     |
| Section 3                                | 21 (28.4)    | 24           | 91%              | 0.86     | 0.66-1.00     |
| Section 4                                | 29 (30.2)    | 46           | 86%              | 0.84     | 0.70-0.96     |
| Section 5                                | 14 (20.6)    | 23           | 94%              | 0.93     | 0.76-1.00     |
| Section 6                                | 19 (22.4)    | 28           | 80%              | 0.75     | 0.54-0.94     |

N: number of responses coded; k: kappa coefficient; CI: confidence interval.
